# Supplementary material for: Fecal Microbiota, Forage Nutrients, and Metabolic Responses of Horses Grazing Warm- and Cool-Season Grass Pastures
Source: MDPI journal article supplement (doi:10.3390/ani13050790), 2023-02-22
Supplement: s1 [file s1]

**Table S3.** Taxonomic classification<sup>1</sup> of all amplicon sequence variants (ASV)<sup>2</sup>.

| Taxonomic Lineage |                  |                 |                         |                                 |                              |                      | ASV Count <sup>3</sup> |
|-------------------|------------------|-----------------|-------------------------|---------------------------------|------------------------------|----------------------|------------------------|
| Kingdom           | Phylum           | Class           | Order                   | Family                          | Genus                        | Species              |                        |
| Archaea           | Euryarchaeota    | Methanobacteria | Methanobacteriales      | Methanobacteriaceae             | Methanobrevibacter           | -----                | 5                      |
|                   | Halobacterota    | Methanomicrobia | Methanomicrobiales      | Methanocorpusculaceae           | Methanobrevibacter           | uncultured archeon   | 6                      |
|                   | Thermoplasmatota | Thermoplasmata  | Methanomassiliicoccales | Methanomethylophilaceae         | uncultured                   | -----                | 1                      |
| Bacteria          | -----            | -----           | -----                   | -----                           | -----                        | -----                | 5                      |
|                   | Actinobacteriota | Coriobacteriia  | Coriobacteriales        | Coriobacteriales Incertae Sedis | Phoenicibacter               | uncultured bacterium | 4                      |
|                   |                  |                 |                         |                                 | uncultured                   | Uncultured bacterium | 1                      |
|                   |                  |                 |                         | Eggerthellaceae                 | -----                        | -----                | 2                      |
|                   |                  |                 |                         |                                 | Denitrobacterium             | D. detoxificans      | 1                      |
|                   |                  |                 |                         |                                 | Parvibacter                  | uncultured bacterium | 1                      |
|                   |                  |                 |                         |                                 | uncultured                   | uncultured bacterium | 3                      |
|                   |                  |                 |                         | uncultured                      | uncultured                   | uncultured bacterium | 1                      |
|                   |                  |                 |                         |                                 |                              |                      |                        |
| Bacteria          | Armatimonadota   | -----           | -----                   | -----                           | -----                        | -----                | 1                      |
|                   |                  | uncultured      | uncultured              | uncultured                      | -----                        | -----                | 1                      |
|                   |                  |                 |                         |                                 | uncultured                   | uncultured bacterium | 4                      |
| Bacteria          | Bacteroidetes    | Bacteroidia     | -----                   | -----                           | -----                        | -----                | 4                      |
|                   |                  |                 | Bacteroidales           | -----                           | -----                        | -----                | 9                      |
|                   |                  |                 |                         | Bacteroidales BS11 gut group    | Bacteroidales BS11 gut group | -----                | 1                      |
|                   |                  |                 |                         |                                 |                              | uncultured bacterium | 4                      |
|                   |                  |                 |                         | Bacteroidales RF16 group        | Bacteroidales RF16 group     | -----                | 1                      |
|                   |                  |                 |                         |                                 |                              | uncultured bacterium | 12                     |
|                   |                  |                 |                         | Bacteroidales UCG-001           | Bacteroidales UCG-001        | -----                | 4                      |
|                   |                  |                 |                         |                                 |                              | uncultured bacterium | 5                      |
|                   |                  |                 |                         |                                 |                              | uncultured rumen     | 4                      |
|                   |                  |                 |                         | Bacteroidetes BD2-2             | Bacteroidetes BD2-2          | uncultured rumen     | 1                      |

|                               |                               |                                |    |
|-------------------------------|-------------------------------|--------------------------------|----|
| <i>CAP-aah99b04</i>           | <i>CAP-aah99b04</i>           | <i>uncultured bacterium</i>    | 1  |
| <i>Dysgonomonadaceae</i>      | <i>Uncultured</i>             | <i>uncultured bacterium</i>    | 1  |
| <i>F082</i>                   | <i>F082</i>                   | -----                          | 2  |
|                               |                               | <i>Bacteriodales bacterium</i> | 1  |
|                               |                               | <i>uncultured bacterium</i>    | 32 |
| <i>gir-aah93h0</i>            | <i>gir-aah93h0</i>            | <i>uncultured bacterium</i>    | 1  |
| <i>M2PB4-65 termite group</i> | <i>M2PB4-65 termite group</i> | <i>uncultured bacterium</i>    | 4  |
| <i>Marinifilaceae</i>         | <i>uncultured</i>             | <i>uncultured bacterium</i>    | 2  |
| <i>Muribaculaceae</i>         | <i>Muribaculaceae</i>         | -----                          | 1  |
|                               |                               | <i>uncultured bacterium</i>    | 3  |
| <i>p-251-o5</i>               | <i>p-251-o5</i>               | <i>uncultured bacterium</i>    | 28 |
| <i>Paludibacteraceae</i>      | <i>uncultured</i>             | <i>uncultured bacterium</i>    | 9  |
| <i>Prevotellaceae</i>         | -----                         | -----                          | 1  |
|                               | <i>Alloprevotella</i>         | -----                          | 7  |
|                               |                               | <i>uncultured bacterium</i>    | 4  |
|                               | <i>Prevotella</i>             | -----                          | 10 |
|                               |                               | <i>uncultured</i>              | 1  |
|                               |                               | <i>Prevotellaceae</i>          |    |
|                               | <i>Prevotellaceae</i>         | <i>unidentified rumen</i>      | 1  |
|                               | <i>Ga6A1 group</i>            |                                |    |
|                               | <i>Prevotellaceae UCG-001</i> | <i>uncultured bacterium</i>    | 7  |
|                               |                               | <i>uncultured</i>              | 2  |
|                               |                               | <i>Prevotellaceae</i>          |    |
|                               |                               | <i>wallaby gut</i>             | 6  |
|                               | <i>Prevotellaceae UCG-003</i> | -----                          | 3  |
|                               | <i>Prevotellaceae UCG-004</i> | <i>uncultured bacterium</i>    | 12 |
| <i>Rikenellaceae</i>          | -----                         | -----                          | 1  |
|                               | <i>Alistipes</i>              | <i>uncultured bacterium</i>    | 1  |
|                               | <i>dgA-11 gut group</i>       | <i>uncultured bacterium</i>    | 2  |
|                               | <i>hoa5-07d05 gut group</i>   | <i>uncultured bacterium</i>    | 7  |
|                               | <i>Mucinivorans</i>           | <i>uncultured bacterium</i>    | 1  |

|                 |                         |                         |                            |                                  |                                      |                                |    |
|-----------------|-------------------------|-------------------------|----------------------------|----------------------------------|--------------------------------------|--------------------------------|----|
|                 |                         |                         |                            |                                  | <i>Rikenellaceae RC9 gut group</i>   | -----                          | 19 |
|                 |                         |                         |                            |                                  |                                      | <i>uncultured bacterium</i>    | 79 |
|                 |                         |                         |                            |                                  |                                      | <i>uncultured</i>              | 2  |
|                 |                         |                         |                            |                                  |                                      | <i>Bacteriodales</i>           |    |
|                 |                         |                         |                            |                                  |                                      | <i>uncultured beta</i>         | 6  |
|                 |                         |                         |                            |                                  |                                      | <i>uncultured Rikenella</i>    | 1  |
|                 |                         |                         |                            |                                  |                                      | <i>wallaby gut</i>             | 2  |
|                 |                         |                         |                            |                                  | <i>SP3-e08</i>                       | <i>uncultured bacterium</i>    | 15 |
|                 |                         |                         |                            | <i>uncultured</i>                | <i>uncultured</i>                    | <i>uncultured bacterium</i>    | 2  |
| <i>Bacteria</i> | <i>Chloroflexi</i>      | <i>Anaerolineae</i>     | <i>Anaerolineales</i>      | <i>Anaerolineaceae</i>           | <i>Flexilinea</i>                    | <i>uncultured bacterium</i>    | 2  |
| <i>Bacteria</i> | <i>Cyanobacteria</i>    | <i>Vampirivibrionia</i> | <i>Gastranaerophilales</i> | <i>Gastranaerophilales</i>       | <i>Gastranaerophilales</i>           | -----                          | 1  |
|                 |                         |                         |                            |                                  | <i>Gastranaerophilales</i>           | <i>uncultured bacterium</i>    | 1  |
| <i>Bacteria</i> | <i>Desulfobacterota</i> | <i>Desulfovibrionia</i> | <i>Desulfovibrionales</i>  | <i>Desulfovibrionaceae</i>       | <i>Desulfovibrio</i>                 | -----                          | 3  |
|                 |                         |                         |                            |                                  | <i>Mailhella</i>                     | -----                          | 1  |
|                 |                         |                         |                            |                                  |                                      | <i>uncultured bacterium</i>    | 1  |
| <i>Bacteria</i> | <i>Elusimicrobiota</i>  | <i>Endomicrobia</i>     | <i>Endomicrobales</i>      | <i>Endomicrobiaceae</i>          | <i>Endomicrobium</i>                 | <i>uncultured bacterium</i>    | 1  |
| <i>Bacteria</i> | <i>Fibrobacterota</i>   | <i>Fibrobacteria</i>    | <i>Fibrobacterales</i>     | <i>Fibrobacteraceae</i>          | <i>Fibrobacter</i>                   | -----                          | 1  |
|                 |                         |                         |                            |                                  |                                      | <i>Fibrobacter sp</i>          | 3  |
| <i>Bacteria</i> | <i>Firmicutes</i>       | -----                   | -----                      | -----                            | -----                                | -----                          | 2  |
|                 |                         | <i>Bacilli</i>          | <i>Bacillales</i>          | <i>Bacillaceae</i>               | <i>Bacillus</i>                      | -----                          | 1  |
|                 |                         |                         | <i>Erysipelotrichales</i>  | <i>Erysipelatoclostridiaceae</i> | -----                                | -----                          | 2  |
|                 |                         |                         |                            |                                  | <i>Candidatus Stoquefichus</i>       | <i>Candidatus Stoquefichus</i> | 1  |
|                 |                         |                         |                            |                                  | <i>Erysipelatoclostridium</i>        | <i>uncultured bacterium</i>    | 2  |
|                 |                         |                         |                            |                                  | <i>UCG-004</i>                       | -----                          | 2  |
|                 |                         |                         |                            |                                  |                                      | <i>uncultured bacterium</i>    | 7  |
|                 |                         |                         |                            |                                  | <i>uncultured</i>                    | <i>Uncultured</i>              | 1  |
|                 |                         |                         |                            |                                  | <i>[Anaerorhabdus] furcosa group</i> | <i>Erysipelotrichaceae</i>     |    |
|                 |                         |                         |                            |                                  | <i>Catenisphaera</i>                 | <i>uncultured rumen</i>        | 1  |
|                 |                         |                         |                            |                                  | <i>uncultured</i>                    | <i>uncultured bacterium</i>    | 4  |
|                 |                         |                         |                            |                                  |                                      | <i>uncultured bacterium</i>    | 3  |

|                   |                             |                               |                            |                                |    |
|-------------------|-----------------------------|-------------------------------|----------------------------|--------------------------------|----|
| <i>Clostridia</i> | <i>Izemoplasmales</i>       | <i>Izemoplasmales</i>         | <i>Izemoplasmales</i>      | -----                          | 1  |
|                   |                             |                               |                            | uncultured bacterium           | 3  |
|                   | <i>Lactobacillales</i>      | <i>Lactobacillaceae</i>       | <i>Lactobacillus</i>       | -----                          | 1  |
|                   |                             |                               |                            | <i>L. equigenerosi</i>         | 1  |
|                   |                             |                               |                            | uncultured methanogenic        | 2  |
|                   |                             |                               | <i>Streptococcus</i>       | -----                          | 1  |
|                   | <i>Paenibacillales</i>      | <i>Paenibacillaceae</i>       | <i>Paenibacillus</i>       | -----                          | 1  |
|                   |                             |                               |                            | <i>P. turicensis</i>           | 1  |
|                   | <i>RF39</i>                 | <i>RF39</i>                   | <i>RF39</i>                | -----                          | 12 |
|                   |                             |                               |                            | uncultured bacterium           | 1  |
|                   |                             |                               |                            | uncultured prokaryote          | 1  |
|                   | -----                       | -----                         | -----                      | -----                          | 15 |
|                   | <i>Caldicoprobacterales</i> | <i>Caldicoprobacteraceae</i>  | <i>Caldicoprobacter</i>    | uncultured bacterium           | 1  |
|                   | <i>Christensenellales</i>   | <i>Christensenellaceae</i>    | <i>Christensenellaceae</i> | -----                          | 78 |
|                   |                             |                               | <i>R-7 group</i>           | -----                          | 1  |
|                   |                             |                               |                            | <i>Christensenella</i> sp.     | 2  |
|                   |                             |                               |                            | gut metagenome                 | 1  |
|                   |                             |                               |                            | human gut                      | 1  |
|                   |                             |                               |                            | uncultured bacterium           | 5  |
|                   |                             |                               |                            | uncultured <i>Clostridia</i>   | 2  |
|                   |                             |                               |                            | uncultured prokaryote          | 2  |
|                   |                             |                               |                            | uncultured rumen               | 12 |
|                   |                             |                               |                            | unidentified rumen             | 3  |
|                   | <i>Clostridia</i>           | <i>Hungateiclostridiaceae</i> | <i>Ruminiclostridium</i>   | unculture rumen                | 2  |
|                   |                             |                               | <i>Saccharofermentans</i>  | -----                          | 5  |
|                   |                             |                               | <i>Saccharofermentans</i>  | <i>Clostridiales</i> bacterium | 1  |
|                   |                             |                               |                            | <i>Ruminococcaceae</i>         | 1  |
|                   |                             |                               |                            | bacterium                      |    |
|                   |                             |                               |                            | uncultured bacterium           | 4  |
|                   |                             |                               | uncultured                 | uncultured bacterium           | 1  |
|                   | <i>Clostridia</i> UCG-014   | <i>Clostridia</i> UCG-014     | <i>Clostridia</i> UCG-014  | -----                          | 12 |
|                   |                             |                               |                            | uncultured bacterium           | 4  |

|                                   |                                   |                                     |                                   |    |
|-----------------------------------|-----------------------------------|-------------------------------------|-----------------------------------|----|
| <i>Clostridia vadinBB60 group</i> | <i>Clostridia vadinBB60 group</i> | <i>Clostridia vadinBB60 group</i>   | -----                             | 2  |
|                                   |                                   |                                     | <i>Clostridiales bacterium</i>    | 1  |
|                                   |                                   |                                     | <i>metagenome</i>                 | 1  |
|                                   |                                   |                                     | <i>uncultured bacterium</i>       | 5  |
| <i>Clostridiales</i>              | <i>Clostridiaceae</i>             | <i>Clostridium sensu stricto 1</i>  | -----                             | 4  |
|                                   |                                   |                                     | <i>Clostridium butyricum</i>      | 2  |
|                                   |                                   | <i>Sarcina</i>                      | <i>uncultured bacterium</i>       | 1  |
| <i>Eubacteriales</i>              | <i>Anaerofustaceae</i>            | <i>Anaerofustis</i>                 | <i>uncultured bacterium</i>       | 1  |
|                                   | <i>Eubacteriaceae</i>             | <i>Eubacterium</i>                  | -----                             | 3  |
|                                   |                                   |                                     | <i>uncultured bacterium</i>       | 3  |
| <i>Lachnospirales</i>             | -----                             | -----                               | -----                             | 3  |
|                                   | <i>Defluviitaleaceae</i>          | <i>Defluviitaleaceae UCG-011</i>    | <i>uncultured bacterium</i>       | 2  |
|                                   | <i>Lachnospiraceae</i>            | -----                               | -----                             | 74 |
|                                   |                                   | <i>[Eubacterium] hallii group</i>   | <i>uncultured bacterium</i>       | 8  |
|                                   |                                   | <i>Acetitomaculum</i>               | <i>uncultured bacterium</i>       | 3  |
|                                   |                                   | <i>Agathobacter</i>                 | <i>uncultured rumen</i>           | 1  |
|                                   |                                   | <i>Blautia</i>                      | -----                             | 6  |
|                                   |                                   | <i>Cellulosilyticum</i>             | <i>uncultured bacterium</i>       | 3  |
|                                   |                                   |                                     | <i>uncultured Clostridia</i>      | 1  |
|                                   |                                   | <i>Coproccoccus</i>                 | -----                             | 2  |
|                                   |                                   |                                     | <i>uncultured rumen</i>           | 1  |
|                                   |                                   | <i>FD2005</i>                       | <i>uncultured bacterium</i>       | 1  |
|                                   |                                   | <i>Frisingicoccus</i>               | <i>uncultured bacterium</i>       | 1  |
|                                   |                                   | <i>Johnsonella</i>                  | <i>Uncultured Lachnospiraceae</i> | 1  |
|                                   |                                   | <i>Lachnoclostridium</i>            | -----                             | 2  |
|                                   |                                   |                                     | <i>uncultured bacterium</i>       | 1  |
|                                   |                                   | <i>Lachnospiraceae AC2044 group</i> | -----                             | 3  |
|                                   |                                   |                                     | <i>uncultured bacterium</i>       | 7  |
|                                   |                                   |                                     | <i>uncultured rumen</i>           | 3  |

|                          |                             |   |
|--------------------------|-----------------------------|---|
| <i>Lachnospiraceae</i>   | <i>uncultured bacterium</i> | 1 |
| <i>FCS020 group</i>      |                             |   |
| <i>Lachnospiraceae</i>   | <i>uncultured</i>           | 3 |
| <i>ND3007 group</i>      | <i>Lachnospiraceae</i>      |   |
|                          | <i>uncultured rumen</i>     | 2 |
| <i>Lachnospiraceae</i>   | -----                       | 2 |
| <i>NK4A136 group</i>     |                             |   |
|                          | <i>uncultured rumen</i>     | 2 |
| <i>Lachnospiraceae</i>   | <i>uncultured bacterium</i> | 2 |
| <i>NK4B4 group</i>       |                             |   |
| <i>Lachnospiraceae</i>   | -----                       | 1 |
| <i>UCG-002</i>           |                             |   |
| <i>Lachnospiraceae</i>   | <i>uncultured rumen</i>     | 1 |
| <i>UCG-006</i>           |                             |   |
| <i>Lachnospiraceae</i>   | <i>uncultured</i>           | 1 |
| <i>UCG-008</i>           | <i>Lachnospiraceae</i>      |   |
|                          | <i>uncultured rumen</i>     | 1 |
| <i>Lachnospiraceae</i>   | <i>uncultured bacterium</i> | 9 |
| <i>UCG-009</i>           |                             |   |
| <i>Lachnospiraceae</i>   | <i>uncultured bacterium</i> | 1 |
| <i>UCG-010</i>           |                             |   |
|                          | <i>uncultured rumen</i>     | 1 |
| <i>Lachnospiraceae</i>   | -----                       | 4 |
| <i>XPB1014 group</i>     |                             |   |
|                          | <i>uncultured bacterium</i> | 9 |
| <i>Marvinbryantia</i>    | -----                       | 5 |
|                          | <i>uncultured bacterium</i> | 5 |
|                          | <i>uncultured</i>           | 1 |
|                          | <i>Lachnospiraceae</i>      |   |
|                          | <i>uncultured rumen</i>     | 1 |
| <i>Oribacterium</i>      | <i>uncultured bacterium</i> | 4 |
| <i>Probable genus 10</i> | <i>uncultured bacterium</i> | 1 |
| <i>Pseudobutyrvibrio</i> | -----                       | 1 |
| <i>Roseburia</i>         | -----                       | 2 |
| <i>Syntrophococcus</i>   | <i>uncultured bacterium</i> | 1 |
|                          | <i>uncultured rumen</i>     | 2 |
| <i>uncultured</i>        | -----                       | 1 |

|                        |                                          |                                             |                          |    |
|------------------------|------------------------------------------|---------------------------------------------|--------------------------|----|
| <i>Monoglobales</i>    | <i>Monoglobaceae</i>                     | <i>Monoglobus</i>                           | -----                    | 1  |
|                        |                                          |                                             | uncultured bacterium     | 7  |
|                        |                                          |                                             | uncultured               | 1  |
|                        |                                          |                                             | Clostridiaceae           |    |
|                        |                                          |                                             | uncultured rumen         | 1  |
| <i>Oscillospirales</i> | -----                                    | -----                                       | -----                    | 10 |
|                        | [Eubacterium]<br>coprostanoligenes group | [Eubacterium]<br>coprostanoligenes<br>group | -----                    | 21 |
|                        |                                          |                                             | uncultured bacterium     | 15 |
|                        |                                          |                                             | uncultured rumen         | 5  |
|                        |                                          |                                             | uncultured               | 2  |
|                        |                                          |                                             | Ruminococcaceae          |    |
|                        | Butyricoccaceae                          | UCG-009                                     | uncultured bacterium     | 3  |
|                        | Ethanoligenenaceae                       | Incertae Sedis                              | uncultured bacterium     | 1  |
|                        | Oscillospiraceae                         | -----                                       | -----                    | 20 |
|                        |                                          | Colidextribacter                            | -----                    | 1  |
|                        |                                          |                                             | uncultured rumen         | 2  |
|                        |                                          | NK4A214 group                               | -----                    | 25 |
|                        |                                          |                                             | uncultured bacterium     | 5  |
|                        |                                          |                                             | uncultured rumen         | 10 |
|                        |                                          |                                             | uncultured               | 1  |
|                        |                                          |                                             | Ruminococcaceae          |    |
|                        |                                          | Papillibacter                               | uncultured bacterium     | 2  |
|                        |                                          |                                             | uncultured               | 2  |
|                        |                                          |                                             | Clostridiaceae           |    |
|                        |                                          |                                             | uncultured Clostridiales | 1  |
|                        |                                          | UCG-002                                     | -----                    | 13 |
|                        |                                          |                                             | uncultured bacterium     | 4  |
|                        |                                          | UCG-005                                     | -----                    | 9  |
|                        |                                          |                                             | Metagenome               | 1  |
|                        |                                          |                                             | uncultured bacterium     | 2  |
|                        |                                          |                                             | uncultured organism      | 2  |
|                        |                                          |                                             | uncultured rumen         | 7  |

|                 |                   |                          |    |
|-----------------|-------------------|--------------------------|----|
|                 | UCG-007           | uncultured rumen         | 2  |
|                 | uncultured        | -----                    | 2  |
|                 | uncultured        | uncultured               | 1  |
|                 | V9D2013 group     | -----                    | 1  |
|                 |                   | uncultured bacterium     | 1  |
| Ruminococcaceae | -----             | -----                    | 4  |
|                 | Candidatus        | -----                    | 1  |
|                 | Soleaferrea       |                          |    |
|                 |                   | Uncultured               | 1  |
|                 |                   | Acetanaerobacterium      |    |
|                 |                   | uncultured bacterium     | 2  |
|                 | Caproiciproducens | -----                    | 3  |
|                 | Fournierella      | Uncultured Firmicutes    | 1  |
|                 | Pygmaibacter      | uncultured bacterium     | 3  |
|                 | Ruminococcus      | -----                    | 10 |
|                 |                   | Bacterium YRD2003        | 1  |
|                 |                   | R. flavefaciens          | 3  |
|                 |                   | Ruminococcus sp.         | 1  |
|                 |                   | uncultured               | 1  |
|                 |                   | Clostridiaceae           |    |
|                 | Subdoligranulum   | uncultured               | 1  |
|                 |                   | Ruminococcaceae          |    |
|                 | uncultured        | -----                    | 7  |
|                 |                   | uncultured bacterium     | 7  |
|                 |                   | uncultured Clostridiales | 1  |
|                 |                   | uncultured rumen         | 2  |
| UCG-010         | UCG-010           | -----                    | 53 |
|                 |                   | uncultured bacterium     | 32 |
|                 |                   | uncultured Clostridia    | 1  |
|                 |                   | uncultured organism      | 1  |
|                 |                   | uncultured               | 2  |
|                 |                   | Ruminococcaceae          |    |
|                 |                   | Unidentified             | 1  |
| UCG-011         | UCG-011           | uncultured rumen         | 2  |



|                 |                        |                         |                                                       |                            |                                              |                                |   |
|-----------------|------------------------|-------------------------|-------------------------------------------------------|----------------------------|----------------------------------------------|--------------------------------|---|
|                 |                        |                         | <i>Peptococcales</i>                                  | <i>Peptococcaceae</i>      | -----                                        | -----                          | 1 |
|                 |                        |                         |                                                       |                            | <i>uncultured</i>                            | -----                          | 2 |
|                 |                        |                         |                                                       |                            |                                              | <i>uncultured bacterium</i>    | 1 |
|                 |                        |                         |                                                       |                            |                                              | <i>unidentified</i>            | 1 |
|                 |                        |                         |                                                       | <i>Anaerovoracaceae</i>    | -----                                        | -----                          | 6 |
|                 |                        |                         |                                                       |                            | <i>[Eubacterium]</i><br><i>brachy group</i>  | <i>Uncultured bacterium</i>    | 1 |
|                 |                        |                         |                                                       |                            | <i>[Eubacterium]</i><br><i>nodatum group</i> | -----                          | 1 |
|                 |                        |                         |                                                       |                            | <i>Anaerovorax</i>                           | -----                          | 3 |
|                 |                        |                         |                                                       |                            |                                              | <i>uncultured bacterium</i>    | 1 |
|                 |                        |                         |                                                       |                            |                                              | <i>uncultured rumen</i>        | 6 |
|                 |                        |                         |                                                       |                            | <i>Family XIII AD3011</i><br><i>group</i>    | -----                          | 1 |
|                 |                        |                         |                                                       |                            |                                              | <i>uncultured bacterium</i>    | 7 |
|                 |                        |                         |                                                       |                            | <i>Family XIII UCG-001</i>                   | <i>uncultured bacterium</i>    | 1 |
|                 |                        |                         |                                                       |                            |                                              | <i>uncultured rumen</i>        | 2 |
|                 |                        |                         |                                                       |                            | <i>Mogibacterium</i>                         | -----                          | 1 |
|                 |                        |                         |                                                       |                            |                                              | <i>uncultured bacterium</i>    | 1 |
|                 |                        |                         |                                                       |                            | <i>uncultured</i>                            | <i>uncultured bacterium</i>    | 1 |
|                 |                        |                         | <i>Peptostreptococcales</i><br><i>-Tissierellales</i> | -----                      | -----                                        | -----                          | 1 |
|                 |                        | <i>Negativicutes</i>    | <i>Acidaminococcales</i>                              | <i>Acidaminococcaceae</i>  | <i>Phascolarctobacterium</i>                 | -----                          | 6 |
|                 |                        |                         |                                                       |                            |                                              | <i>uncultured bacterium</i>    | 4 |
|                 |                        |                         | <i>Veillonellales-</i><br><i>Selenomonadales</i>      | <i>Selenomonadaceae</i>    | -----                                        | -----                          | 1 |
|                 |                        |                         |                                                       |                            | <i>Anaerovibrio</i>                          | <i>uncultured bacterium</i>    | 1 |
|                 |                        |                         |                                                       |                            | <i>Quinella</i>                              | -----                          | 1 |
|                 |                        |                         |                                                       |                            | <i>Schwartzia</i>                            | -----                          | 1 |
|                 |                        |                         |                                                       | <i>Veillonellaceae</i>     | <i>Veillonella</i>                           | <i>V. caviae</i>               | 1 |
|                 |                        | <i>Syntrophomonadia</i> | <i>Syntrophomonadales</i>                             | <i>Syntrophomonadaceae</i> | -----                                        | -----                          | 1 |
|                 |                        | <i>uncultured</i>       | <i>uncultured</i>                                     | <i>uncultured</i>          | <i>uncultured</i>                            | <i>iron-reducing bacterium</i> | 1 |
| <i>Bacteria</i> | <i>Planctomycetota</i> | <i>Planctomycetes</i>   | <i>Pirellulales</i>                                   | <i>Pirellulaceae</i>       | <i>p-1088-a5 gut group</i>                   | <i>uncultured bacterium</i>    | 5 |

|                 |                          |                            |                           |                        |                           |                             |    |
|-----------------|--------------------------|----------------------------|---------------------------|------------------------|---------------------------|-----------------------------|----|
|                 |                          | <i>vadinHA49</i>           | <i>vadinHA49</i>          | <i>vadinHA49</i>       | <i>vadinHA49</i>          | -----                       | 1  |
|                 |                          |                            |                           |                        |                           | <i>uncultured bacterium</i> | 1  |
| <i>Bacteria</i> | <i>Proteobacteria</i>    | <i>Alphaproteobacteria</i> | <i>Rhodospirillales</i>   | -----                  | -----                     | -----                       | 1  |
|                 |                          |                            |                           | <i>uncultured</i>      | <i>uncultured</i>         | -----                       | 2  |
|                 |                          |                            |                           |                        |                           | <i>gut metagenome</i>       | 1  |
|                 |                          |                            |                           |                        |                           | <i>Uncultured rumen</i>     | 4  |
|                 |                          | <i>Gammaproteobacteria</i> | <i>Burkholderiales</i>    | -----                  | -----                     | -----                       | 1  |
|                 |                          |                            |                           | <i>T34</i>             | <i>T34</i>                | <i>uncultured bacterium</i> | 1  |
| <i>Bacteria</i> | <i>Spirochaetota</i>     | <i>MVP-15</i>              | <i>MVP-15</i>             | <i>MVP-15</i>          | <i>MVP-15</i>             | -----                       | 2  |
|                 |                          |                            |                           |                        |                           | <i>uncultured bacterium</i> | 1  |
|                 |                          | <i>Spirochaetia</i>        | <i>Spirochaetales</i>     | <i>Spirochaetaceae</i> | <i>Sediminspirochaeta</i> | -----                       | 2  |
|                 |                          |                            |                           |                        | <i>Sphaerochaeta</i>      | -----                       | 1  |
|                 |                          |                            |                           |                        |                           | <i>uncultured bacterium</i> | 3  |
|                 |                          |                            |                           |                        |                           | <i>uncultured rumen</i>     | 7  |
|                 |                          |                            |                           |                        | <i>Treponema</i>          | -----                       | 5  |
|                 |                          |                            |                           |                        |                           | <i>T. ruminis</i>           | 1  |
|                 |                          |                            |                           |                        |                           | <i>uncultured bacterium</i> | 24 |
| <i>Bacteria</i> | <i>Synergistota</i>      | <i>Synergistia</i>         | <i>Synergistales</i>      | <i>Synergistaceae</i>  | -----                     | -----                       | 1  |
|                 |                          |                            |                           |                        | <i>Cloacibacillus</i>     | <i>uncultured bacterium</i> | 1  |
|                 |                          |                            |                           |                        | <i>uncultured</i>         | <i>uncultured bacterium</i> | 1  |
| <i>Bacteria</i> | <i>Verrucomicrobiota</i> | <i>Kiritimatiellae</i>     | <i>WCHB1-41</i>           | <i>WCHB1-41</i>        | <i>WCHB1-41</i>           | -----                       | 6  |
|                 |                          |                            |                           |                        |                           | <i>uncultured bacterium</i> | 21 |
|                 |                          | <i>Lentisphaeria</i>       | <i>Victivallales</i>      | <i>vadinBE97</i>       | <i>vadinBE97</i>          | -----                       | 1  |
|                 |                          | <i>Verrucomicrobiae</i>    | <i>LD1-PB3</i>            | <i>LD1-PB3</i>         | <i>LD1-PB3</i>            | <i>uncultured bacterium</i> | 1  |
|                 |                          |                            | <i>Pedosphaerales</i>     | <i>Pedosphaeraceae</i> | <i>DEV114</i>             | -----                       | 1  |
|                 |                          |                            |                           |                        |                           | <i>uncultured bacterium</i> | 1  |
|                 |                          |                            | <i>Verrucomicrobiales</i> | <i>Akkermansiaceae</i> | <i>Akkermansia</i>        | <i>uncultured bacterium</i> | 4  |

<sup>1</sup> Taxonomic assignment was conducted in Qiime 2 using the most recent SILVA database (SSU 138).

<sup>2</sup> The ASV represent those retained after quality filtering, chimera checking, and filtering low abundance, but prior to rarefaction for subsequent diversity analyses.

<sup>3</sup> Counts of individual ASV with a shared lineage.
