# Supplementary material for: Fecal Microbiota, Forage Nutrients, and Metabolic Responses of Horses Grazing Warm- and Cool-Season Grass Pastures
Source: MDPI journal article supplement (doi:10.3390/ani13050790), 2023-02-22
Supplement: s1 [file s1]

**Figure S2. Fasting plasma glucose and insulin prior to administration of oral sugar tests (OST).**

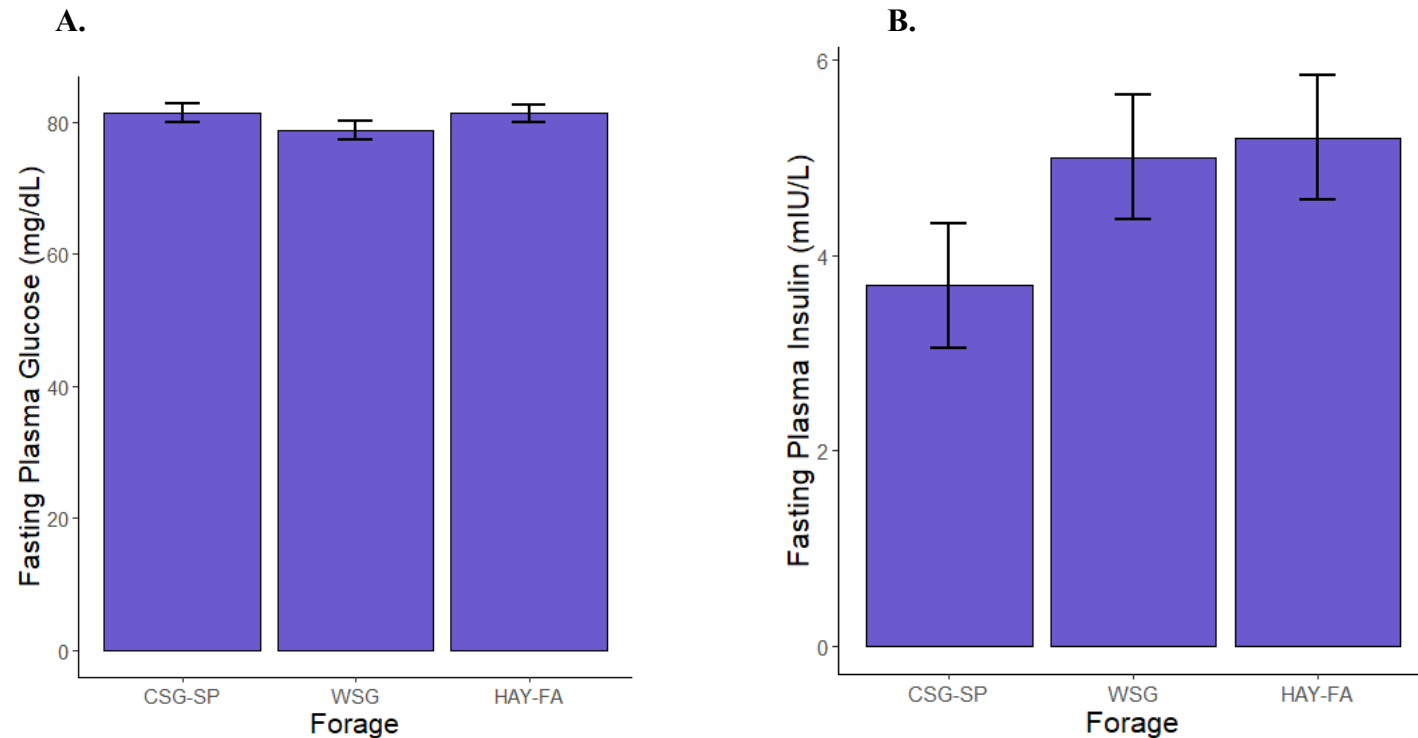

Fasting plasma glucose (a) and insulin (b) prior to administration of oral sugar tests conducted in horses adapted to cool-season grass pasture in the spring (CSG-SP) and warm-season grass in the summer slump period (WSG) within an integrated rotational grazing system in addition to a standardized cool-season grass hay diet in the fall at the end of the grazing season (HAY-FA). Fasting glucose and insulin concentrations represent the mean of two consecutive fasting baseline samples were collected at a 15-min interval prior to administration of the OST. Neither fasting glucose or insulin differed by treatment (mixed model ANOVA with Tukey's post hoc adjustment;  $P > 0.05$ ). Data are presented as means  $\pm$  SEM.
