# Supplementary material for: Fecal Microbiota, Forage Nutrients, and Metabolic Responses of Horses Grazing Warm- and Cool-Season Grass Pastures
Source: MDPI journal article supplement (doi:10.3390/ani13050790), 2023-02-22
Supplement: s1 [file s1]

**Table S2. Horse condition measures following adaptation to hay diets and pasture forages.**

| Horse Condition Measure                             | Forage <sup>1</sup> |                   |                  |                   |                  | SEM  |
|-----------------------------------------------------|---------------------|-------------------|------------------|-------------------|------------------|------|
|                                                     | HAY-SP              | CSG-SP            | WSG              | CSG-FA            | HAY-FA           |      |
| <b>Body Weight, kg</b>                              | 536 <sup>a</sup>    | 551 <sup>ab</sup> | 553 <sup>b</sup> | 541 <sup>ab</sup> | 531 <sup>a</sup> | 18   |
| <b>Body Condition Score, scale: 1-9<sup>2</sup></b> | 5.44                | 5.62              | 5.62             | 5.38              | 5.12             | 0.26 |

<sup>1</sup> HAY-SP: initial standardized cool-season grass hay diet in the spring; CSG-SP: cool-season grass pasture in the spring; WSG: warm-season grass, either crabgrass or bermudagrass, in the summer slump period; CSG-FA: cool-season pasture in the fall; HAY-FA: final standardized cool-season grass hay diet in the fall.

<sup>2</sup> Body condition score was evaluated using the Henneke Body Condition Score scale, with scores assigned on a scale of 1-9 (1 = emaciated and 9 = morbidly obese) [83].

<sup>a,b</sup> Indicates significant difference within rows (mixed model ANOVA with Tukey's post hoc adjustment;  $P \leq 0.05$ )
