# Supplementary material for: Fecal Microbiota, Forage Nutrients, and Metabolic Responses of Horses Grazing Warm- and Cool-Season Grass Pastures
Source: MDPI journal article supplement (doi:10.3390/ani13050790), 2023-02-22
Supplement: s1 [file s1]

**Figure S3. Proxies for insulin sensitivity and the insulin secretory response in horses administered oral sugar tests (OST).**

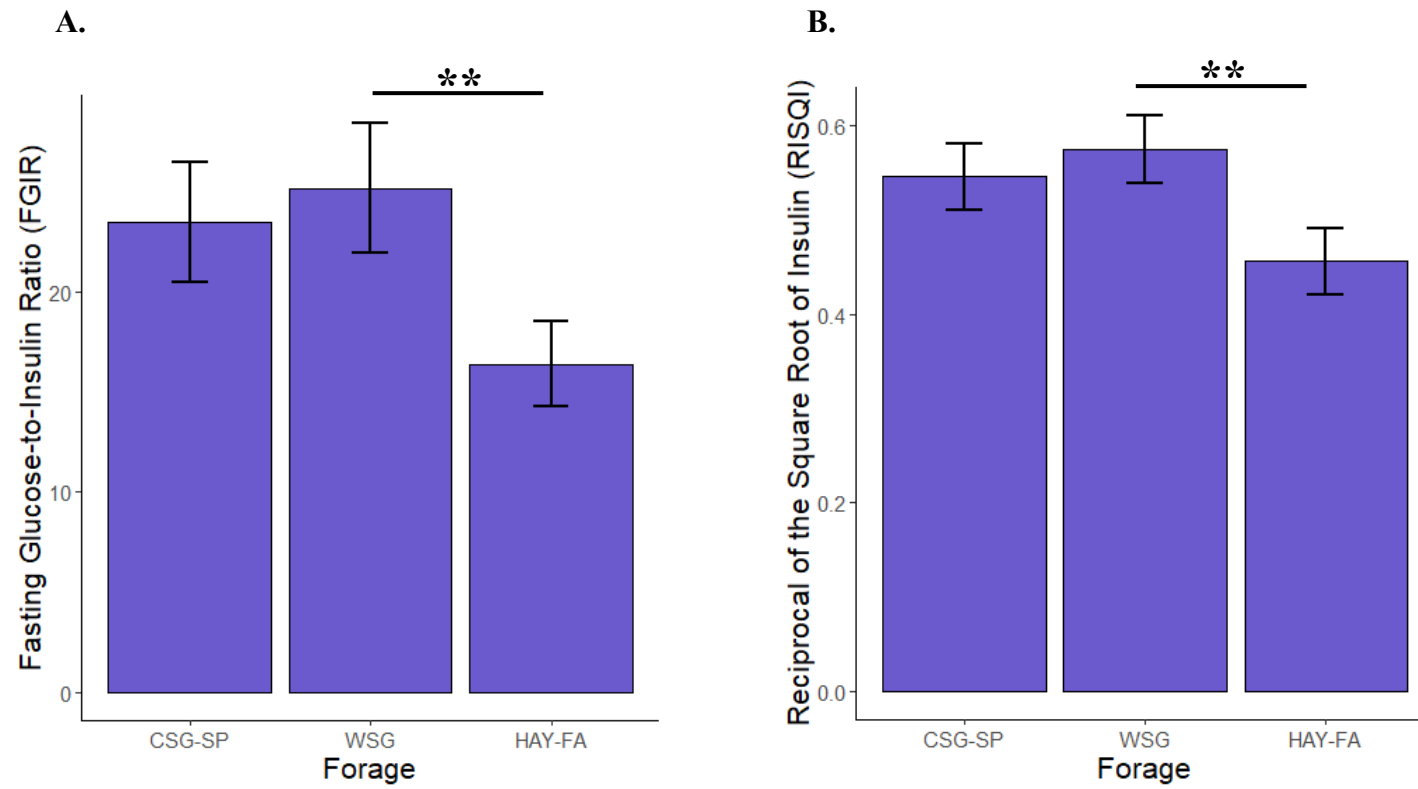

c.

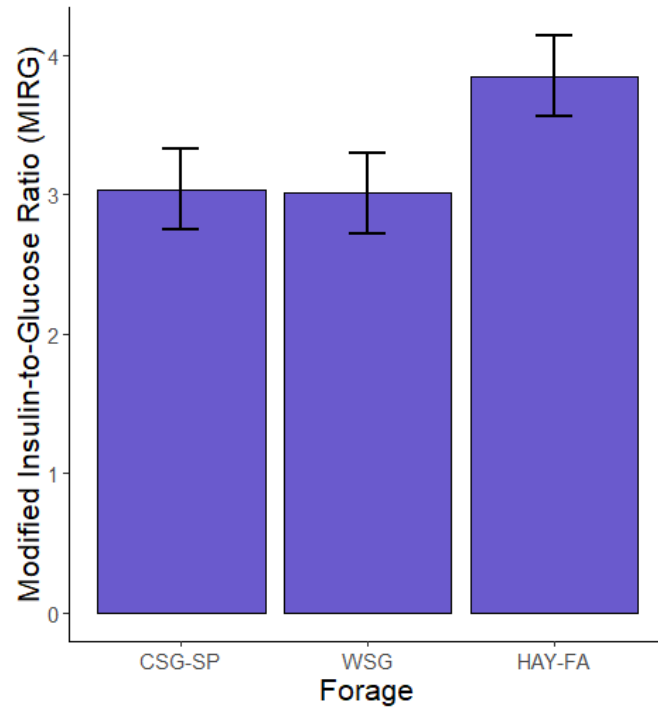

The OST were administered to horses adapted to cool-season grass pasture in the spring (CSG-SP) and warm-season grass in the summer slump period (WSG) within an integrated rotational grazing system in addition to a standardized cool-season grass hay diet in the fall at the end of the grazing season (HAY-FA). Proxies analyzed included the fasting glucose-to-insulin ratio (FGIR; a), the reciprocal of the square root of insulin (RISQI; b), and the modified insulin-to-glucose ratio (MIRG; c). Data are presented as means  $\pm$  SEM. A double asterisk indicates a trend for differences between forages at  $P \leq 0.10$  (mixed model ANOVA with Tukey's post hoc adjustment).
