# Supplementary material for: Fecal Microbiota, Forage Nutrients, and Metabolic Responses of Horses Grazing Warm- and Cool-Season Grass Pastures
Source: MDPI journal article supplement (doi:10.3390/ani13050790), 2023-02-22
Supplement: s1 [file s1]

**Table S1.** Weather data<sup>1</sup>.

| <b>Month</b> | <b>Average Temperature, °C</b> |                               | <b>Total Precipitation, cm</b> |                               |
|--------------|--------------------------------|-------------------------------|--------------------------------|-------------------------------|
|              | <b>2018</b>                    | <b>Historical<br/>Average</b> | <b>2018</b>                    | <b>Historical<br/>Average</b> |
| <b>May</b>   | 18.22                          | 16.17                         | 14.86                          | 10.21                         |
| <b>Jun</b>   | 21.17                          | 21.00                         | 12.60                          | 9.93                          |
| <b>Jul</b>   | 24.61                          | 23.78                         | 10.92                          | 12.32                         |
| <b>Aug</b>   | 25.22                          | 22.78                         | 10.62                          | 11.89                         |
| <b>Sep</b>   | 21.39                          | 19.17                         | 22.40                          | 10.29                         |
| <b>Oct</b>   | 13.44                          | 12.94                         | 8.13                           | 8.97                          |
| <b>Nov</b>   | 5.83                           | 7.11                          | 22.15                          | 8.81                          |
| <b>Dec</b>   | 3.28                           | 1.39                          | 14.76                          | 9.58                          |

<sup>1</sup> Weather data were obtained for the New Brunswick Station through the Office of the New Jersey State Climatologist website [81].
